# Supplementary material for: A System Pharmacology Multi-Omics Approach toward Uncontrolled Pediatric Asthma
Source: MDPI journal article supplement (doi:10.3390/jpm11060484), 2021-05-28
Supplement: s1 [file s1]

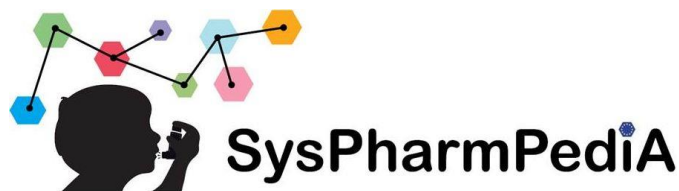

### SysPharmPediA consortium list

The SysPharmPediA consortium wishes to acknowledge the help and expertise of the following individuals and groups without whom, the study would not have been possible.

#### SysPharmPediA members:

| Name:                           | Country:        | Affiliation:                                                                                                                                                                                                                      |
|---------------------------------|-----------------|-----------------------------------------------------------------------------------------------------------------------------------------------------------------------------------------------------------------------------------|
| Olaia Sardón-Prado MD, PhD      | Spain           | Division of Pediatric Respiratory Medicine, Hospital Universitario Donostia, San Sebastián, Spain<br><br>Department of Pediatrics, University of the Basque Country (UPV/EHU), San Sebastián, Spain.                              |
| Paula Corcuera-Elósegui MD, PhD | Spain           | Division of Pediatric Respiratory Medicine, Hospital Universitario Donostia, San Sebastián, Spain.                                                                                                                                |
| Javier Korta-Murua MD, PhD      | Spain           | Division of Pediatric Respiratory Medicine, Hospital Universitario Donostia, San Sebastián, Spain<br><br>Department of Pediatrics, University of the Basque Country (UPV/EHU), San Sebastián, Spain.                              |
| Mahmoud I. Abdel-Aziz MSc       | The Netherlands | Department of Respiratory Medicine, Amsterdam UMC, University of Amsterdam, Amsterdam, The Netherlands.<br><br>Department of Clinical Pharmacy, Faculty of Pharmacy, Assiut University, Assiut, Egypt.                            |
| Paul Brinkman MSc               | The Netherlands | Department of Respiratory Medicine, Amsterdam UMC, University of Amsterdam, Amsterdam, The Netherlands.                                                                                                                           |
| Susanne J. H. Vijverberg PhD    | The Netherlands | Department of Respiratory Medicine, Amsterdam UMC, University of Amsterdam, Amsterdam, The Netherlands.                                                                                                                           |
| Anne H. Neerincx PhD            | The Netherlands | Department of Respiratory Medicine, Amsterdam UMC, University of Amsterdam, Amsterdam, The Netherlands.                                                                                                                           |
| Simone Hashimoto MD PhD         | The Netherlands | Department of Respiratory Medicine, Amsterdam UMC, University of Amsterdam, Amsterdam, The Netherlands.<br><br>Department of Pediatric Respiratory Medicine, Emma Children's Hospital, Amsterdam UMC, Amsterdam, The Netherlands. |
| Aletta D. Kraneveld PhD         | The Netherlands | Division of Pharmacology, Utrecht Institute for Pharmaceutical Sciences, Faculty of Science, Utrecht University, Utrecht, the Netherlands.                                                                                        |

|                                          |                  |                                                                                                                                                                                                                                                                                                                                                                                 |
|------------------------------------------|------------------|---------------------------------------------------------------------------------------------------------------------------------------------------------------------------------------------------------------------------------------------------------------------------------------------------------------------------------------------------------------------------------|
|                                          |                  | Institute for Risk Assessment Sciences, Faculty of Veterinary Medicine, Utrecht University, Utrecht, the Netherlands.                                                                                                                                                                                                                                                           |
| Anke H. Maitland-van der Zee PharmD, PhD | The Netherlands  | <p>Department of Respiratory Medicine, Amsterdam UMC, University of Amsterdam, Amsterdam, The Netherlands.</p> <p>Department of Pediatric Respiratory Medicine, Emma Children's Hospital, Amsterdam UMC, Amsterdam, The Netherlands.</p>                                                                                                                                        |
| Maria Pino-Yanes, PhD                    | Spain - Tenerife | <p>Genomics and Health Group, Department of Biochemistry, Microbiology, Cell Biology and Genetics, Universidad de La Laguna, La Laguna, Santa Cruz de Tenerife, Spain.</p> <p>CIBER de Enfermedades Respiratorias, Instituto de Salud Carlos III, Madrid, Spain.</p> <p>Instituto de Tecnologías Biomédicas (ITB), Universidad de La Laguna, Santa Cruz de Tenerife, Spain.</p> |
| Natalia Hernandez-Pacheco, MSc           | Spain - Tenerife | <p>Research Unit, Hospital Universitario N.S. de Candelaria, Universidad de La Laguna, Santa Cruz de Tenerife, Spain</p> <p>Genomics and Health Group, Department of Biochemistry, Microbiology, Cell Biology and Genetics, Universidad de La Laguna, La Laguna, Santa Cruz de Tenerife, Spain.</p>                                                                             |
| Esther Herrera-Luis, MSc                 | Spain - Tenerife | Genomics and Health Group, Department of Biochemistry, Microbiology, Cell Biology and Genetics, Universidad de La Laguna, La Laguna, Santa Cruz de Tenerife, Spain.                                                                                                                                                                                                             |
| Javier Perez-Garcia, BS                  | Spain - Tenerife | Genomics and Health Group, Department of Biochemistry, Microbiology, Cell Biology and Genetics, Universidad de La Laguna, La Laguna, Santa Cruz de Tenerife, Spain.                                                                                                                                                                                                             |
| Fabian Lorenzo-Diaz, PhD                 | Spain - Tenerife | Genomics and Health Group, Department of Biochemistry, Microbiology, Cell Biology and Genetics, Universidad de La Laguna, La Laguna, Santa Cruz de Tenerife, Spain.                                                                                                                                                                                                             |
| Uroš Potočnik, PhD                       | Slovenia         | <p>Center for Human Molecular Genetics and Pharmacogenomics, Faculty of Medicine, University of Maribor, Maribor, Slovenia.</p> <p>Laboratory for Biochemistry, Molecular biology and Genomics, Faculty of Chemistry and Chemical Engineering, University of Maribor, Maribor, Slovenia.</p>                                                                                    |
| Mario Gorenjak, MBI, PhD                 | Slovenia         | Center for Human Molecular Genetics and Pharmacogenomics, Faculty of Medicine, University of Maribor, Maribor, Slovenia.                                                                                                                                                                                                                                                        |

|                      |          |                                                                                                                                                                                                                                                                                                                                                                                                                  |
|----------------------|----------|------------------------------------------------------------------------------------------------------------------------------------------------------------------------------------------------------------------------------------------------------------------------------------------------------------------------------------------------------------------------------------------------------------------|
| Katja Repnik, PhD    | Slovenia | Center for Human Molecular Genetics and Pharmacogenomics, Faculty of Medicine, University of Maribor, Maribor, Slovenia.<br><br>Laboratory for Biochemistry, Molecular biology and Genomics, Faculty of Chemistry and Chemical Engineering, University of Maribor, Maribor, Slovenia                                                                                                                             |
| Vojko Berce, MD, PhD | Slovenia | Center for Human Molecular Genetics and Pharmacogenomics, Faculty of Medicine, University of Maribor, Maribor, Slovenia.<br><br>Clinic of Pediatrics, University Medical Centre Maribor, Maribor, Slovenia.                                                                                                                                                                                                      |
| Michael Kabesch      | Germany  | Department of Pediatric Pneumology and Allergy, University Children's Hospital Regensburg (KUNO) at the Hospital St. Hedwig of the Order of St. John, University of Regensburg, Regensburg, Germany.<br>Science and Development Campus Regensburg (WECARE), University Children's Hospital Regensburg (KUNO) at the Hospital St. Hedwig of the Order of St. John, University of Regensburg, Regensburg, Germany. |
| Susanne Harner       | Germany  | Department of Pediatric Pneumology and Allergy, University Children's Hospital Regensburg (KUNO) at the Hospital St. Hedwig of the Order of St. John, University of Regensburg, Regensburg, Germany.                                                                                                                                                                                                             |
| Christine Wolff      | Germany  | Science and Development Campus Regensburg (WECARE), University Children's Hospital Regensburg (KUNO) at the Hospital St. Hedwig of the Order of St. John, University of Regensburg, Regensburg, Germany                                                                                                                                                                                                          |
| Antoaneta Toncheva   | Germany  | Department of Pediatric Pneumology and Allergy, University Children's Hospital Regensburg (KUNO) at the Hospital St. Hedwig of the Order of St. John, University of Regensburg, Regensburg, Germany.                                                                                                                                                                                                             |
| Susanne Brandstetter | Germany  | Science and Development Campus Regensburg (WECARE), University Children's Hospital Regensburg (KUNO) at the Hospital St. Hedwig of the Order of St. John, University of Regensburg, Regensburg, Germany.                                                                                                                                                                                                         |
| Elisa Valletta       | Germany  | Science and Development Campus Regensburg (WECARE), University Children's Hospital Regensburg (KUNO) at the Hospital St. Hedwig of the Order of St. John, University of Regensburg, Regensburg, Germany.                                                                                                                                                                                                         |
| Heike Buntrock-Döpke | Germany  | Science and Development Campus Regensburg (WECARE), University Children's Hospital Regensburg (KUNO) at the Hospital St. Hedwig of the Order of St. John, University of Regensburg, Regensburg, Germany.                                                                                                                                                                                                         |

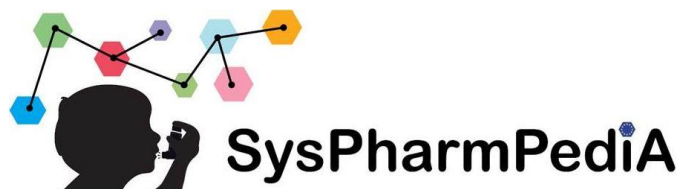

|                           |                 |                                                                                                                                                                                                                                                                                |
|---------------------------|-----------------|--------------------------------------------------------------------------------------------------------------------------------------------------------------------------------------------------------------------------------------------------------------------------------|
| Joris C. Verster PhD      | The Netherlands | <p>Division of Pharmacology, Utrecht Institute for Pharmaceutical Sciences, Faculty of Science, Utrecht University, Utrecht, the Netherlands.</p> <p>Institute for Risk Assessment Sciences, Faculty of Veterinary Medicine, Utrecht University, Utrecht, the Netherlands.</p> |
| Nikki Kerssemakers        | The Netherlands | Division of Pharmacology, Utrecht Institute for Pharmaceutical Sciences, Faculty of Science, Utrecht University, Utrecht, the Netherlands.                                                                                                                                     |
| Catarina Almqvist MD, PhD | Sweden          | <p>Dept of Medical Epidemiology and Biostatistics, Karolinska Institutet, Stockholm, Sweden.</p> <p>Pediatric Allergy and Pulmonology Unit at Astrid Lindgren Children's Hospital, Karolinska University Hospital.</p>                                                         |
| Anna Hedman PhD           | Sweden          | Dept of Medical Epidemiology and Biostatistics, Karolinska Institutet, Stockholm, Sweden.                                                                                                                                                                                      |
| Mwenya Mubanga PhD        | Sweden          | Dept of Medical Epidemiology and Biostatistics, Karolinska Institutet, Stockholm, Sweden.                                                                                                                                                                                      |
| Tong Gong PhD             | Sweden          | Dept of Medical Epidemiology and Biostatistics, Karolinska Institutet, Stockholm, Sweden.                                                                                                                                                                                      |
| Anne Örtqvist             | Sweden          | Dept of Medical Epidemiology and Biostatistics, Karolinska Institutet, Stockholm, Sweden.                                                                                                                                                                                      |

## Others that contributed to SysPharmPedia:

| Name:                                   | Country:        | Affiliation:                                                                                                                                                |
|-----------------------------------------|-----------------|-------------------------------------------------------------------------------------------------------------------------------------------------------------|
| Amaia Lorea Alvarez RN                  | Spain           | Division of Pediatric Respiratory Medicine, Hospital Universitario Donostia, San Sebastián, Spain.                                                          |
| Arantzazu Zugasti Pérez RN              | Spain           | Division of Pediatric Respiratory Medicine, Hospital Universitario Donostia, San Sebastián, Spain.                                                          |
| Miren Lorea Otero Aramburu, NA          | Spain           | Division of Pediatric Respiratory Medicine, Hospital Universitario Donostia, San Sebastián, Spain.                                                          |
| María Isabel Gomez Osua RN <sup>3</sup> | Spain           | Basque Biobank (Basque Biobank), Biodonostia Health Research Institute Association Node<br><a href="http://www.biobancovasco.org">www.biobancovasco.org</a> |
| María Isabel Gomez Osua RN <sup>3</sup> | Spain           | Basque Biobank (Basque Biobank), Biodonostia Health Research Institute Association Node<br><a href="http://www.biobancovasco.org">www.biobancovasco.org</a> |
| Yennece W.F. Dagelet                    | The Netherlands | Department of Respiratory Medicine, Amsterdam UMC, University of Amsterdam, Amsterdam, The Netherlands.                                                     |
| Suzanne Terheggen-Lagro MD, PhD         | The Netherlands | Department of Pediatric Respiratory Medicine, Emma Children's Hospital, Amsterdam UMC, Amsterdam, The Netherlands.                                          |
| Niels W.P. Rutjes MD                    | The Netherlands | Department of Pediatric Respiratory Medicine, Emma Children's Hospital, Amsterdam UMC, Amsterdam, The Netherlands.                                          |
| E. G. Haarman                           | The Netherlands | Department of Pediatric Respiratory Medicine, Emma Children's Hospital, Amsterdam UMC, Amsterdam, The Netherlands.                                          |
| T. Dekker                               | The Netherlands | Department of Experimental Immunology, Academic Medical Center (AMC), University of Amsterdam, Amsterdam, The Netherlands.                                  |
| B.S Dierdorp                            | The Netherlands | Department of Experimental Immunology, Academic Medical Center (AMC), University of Amsterdam, Amsterdam, The Netherlands.                                  |
| R. Khurshid                             | The Netherlands | Department of Experimental Immunology, Academic Medical Center (AMC), University of Amsterdam, Amsterdam, The Netherlands.                                  |
| B. Kapitein, MD, PhD                    | The Netherlands | Paediatric Intensive Care, Emma Children's Hospital, Amsterdam UMC, Amsterdam, The Netherlands.                                                             |
| G. Biesbroek                            | The Netherlands | Department of Pediatric Respiratory Medicine, Emma Children's Hospital, Amsterdam UMC, Amsterdam, The Netherlands.                                          |
| J. Israels                              | The Netherlands | Department of Pediatric Respiratory Medicine, Emma Children's Hospital, Amsterdam UMC, Amsterdam, The Netherlands.                                          |

|                       |                 |                                                                                                                    |
|-----------------------|-----------------|--------------------------------------------------------------------------------------------------------------------|
| C. Brackel            | The Netherlands | Department of Pediatric Respiratory Medicine, Emma Children's Hospital, Amsterdam UMC, Amsterdam, The Netherlands. |
| M. Verwaal – Maasstad | The Netherlands | Department of Pediatrics, Maasstad Hospital, Rotterdam, The Netherlands.                                           |
| D. Seljogi            | The Netherlands | Department of Pediatric Respiratory Medicine, Emma Children's Hospital, Amsterdam UMC, Amsterdam, The Netherlands. |
| P.F.M. Mau Asam       | The Netherlands | Department of Respiratory Medicine, Amsterdam UMC, University of Amsterdam, Amsterdam, The Netherlands.            |
| S. J.A. Lone-Latif    | The Netherlands | Department of Respiratory Medicine, Amsterdam UMC, University of Amsterdam, Amsterdam, The Netherlands.            |
| Davey Stigters        | The Netherlands | Utrecht University, Master Pharmacy, Utrecht, The Netherlands.                                                     |
| Emine Sariguney       | The Netherlands | Department of Respiratory Medicine, Amsterdam UMC, University of Amsterdam, Amsterdam, The Netherlands.            |
| André Franke          | Germany         | Kiel                                                                                                               |
| Juha Kere             | Sweden/Finland  | Stockholm/Helsinki                                                                                                 |
| Anne Örtqvist         | Sweden          | Dept of Medical Epidemiology and Biostatistics, Karolinska Institutet, Stockholm, Sweden.                          |
| Vilhelmina Ullemar    | Sweden          | Dept of Medical Epidemiology and Biostatistics, Karolinska Institutet, Stockholm, Sweden.                          |
| Karin Dellenvall      | Sweden          | Dept of Medical Epidemiology and Biostatistics, Karolinska Institutet, Stockholm, Sweden.                          |



### **Funding:**

The SysPharmPediA consortium is supported by ZonMW [project number: 9003035001], the Ministry of Education, Science, and Sport of the Republic of Slovenia [contract number C330-16-500106]; the German Ministry of Education and Research (BMBF) [project number FKZ 031L0088]; Instituto de Salud Carlos III (ISCIII) through Strategic Action for Health Research (AES) and European Community (EC) within the Active and Assisted Living (AAL) Program framework [award numbers AC15/00015 and AC15/00058] under the frame of the ERA-CoSysMed JTC-1 Call. M.P.-Y. was funded by the Ramón y Cajal Program (RYC-2015-17205) by the Spanish Ministry of Science and Innovation (MICINN), the State Research Agency, and the European Regional Development Fund from the European Union (MICINN/AEI/FEDER, UE, grant SAF2017-83417R). J.P.-G. was supported by a Ph.D. fellowship (FPU19/02175) granted by MICINN. U.P. and M.G. were funded by Slovenian Research Agency (research core funding No. P3-0067). M.I.A.-A. was funded by the Egyptian Government Ph.D. Scholarships. The STOPPA study was funded by the Swedish Research Council project grant 2018-02640 and the Swedish Asthma and Allergy Research Foundation.

### **Input Spain:**

Human samples and related data used in this study were provided by the Basque Biobank/Biodonostia Node [www.biobancovasco.org](http://www.biobancovasco.org) and were processed following standard operating procedures with appropriate approval of the relevant Ethics Committee and Scientific Advisory Board.
