# Supplementary material for: A System Pharmacology Multi-Omics Approach toward Uncontrolled Pediatric Asthma
Source: MDPI journal article supplement (doi:10.3390/jpm11060484), 2021-05-28
Supplement: s1 [file s1]

**Genomics**

**Epigenomics**

**Environmental  
exposures**

**Transcriptomics**

**Microbiome**

**Proteomics**

**Demographics/  
Clinical  
characteristics**

**Metabolomics**

**Asthma  
phenotyping**
