# Supplementary figures and images for: A System Pharmacology Multi-Omics Approach toward Uncontrolled Pediatric Asthma
Source: MDPI journal article supplement (doi:10.3390/jpm11060484), 2021-05-28

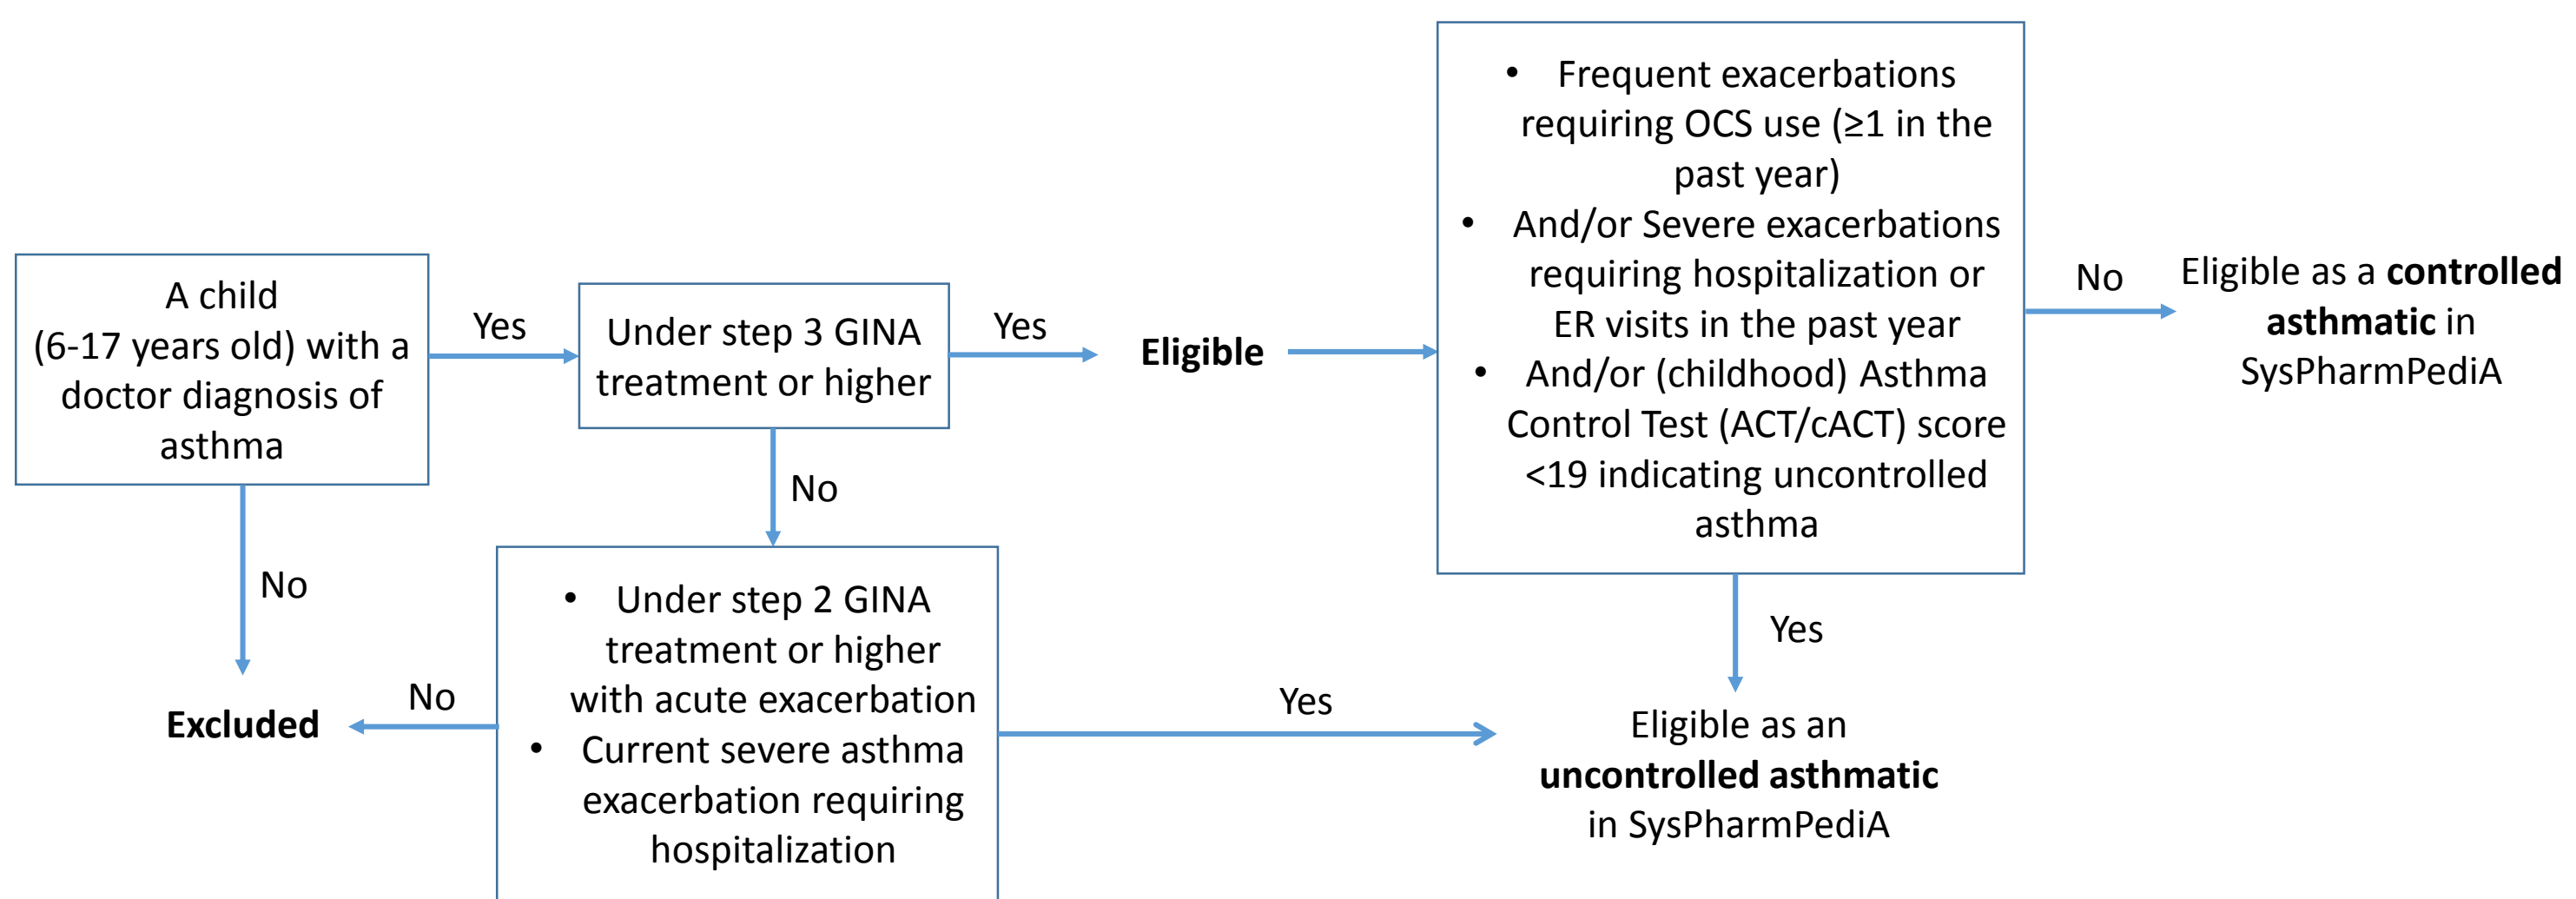

Supplement: s1 [file s1]
